# Supplementary material
Source: PubMed Central journal article supplement (PMC4874333)
Supplement: am6b01364_si_001.pdf [file am6b01364_si_001.pdf]

# Supporting Information

## Gelatin Microgel Incorporated Poly(Ethylene Glycol)-based Bioadhesive with Enhanced Adhesive Property and Bioactivity

### AUTHOR INFORMATION

*Yuting Li, Hao Meng, Yuan Liu, Ameya Narkar and Bruce P. Lee\**

Department of Biomedical Engineering, Michigan Technological University,  
Houghton, Michigan, 49931, United States

**\* Corresponding author information:**

Bruce P. Lee, PhD

Email: [bplee@mtu.edu](mailto:bplee@mtu.edu)

Phone: (906) 487-3262

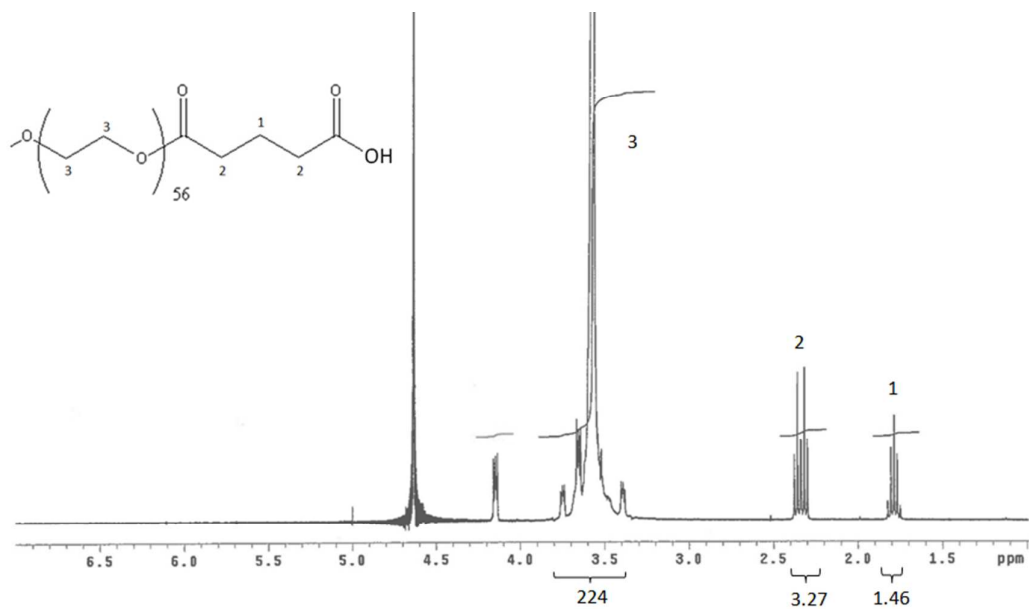

**Figure S1.** NMR spectrum of PEGGlu.

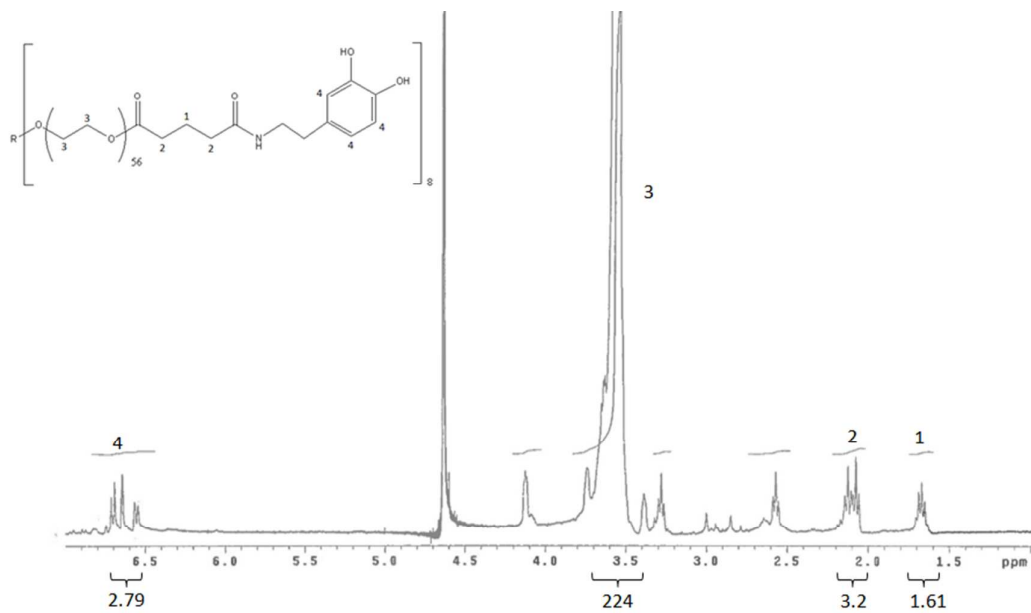

**Figure S2.** NMR spectrum of PEGDM.

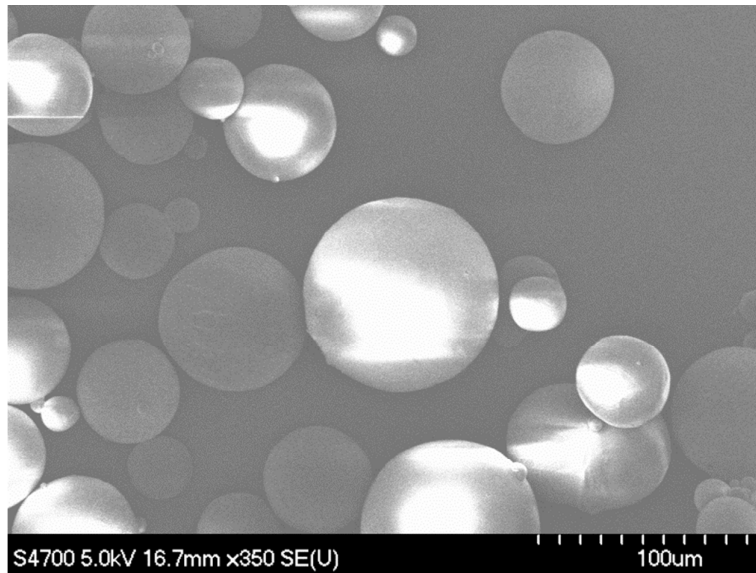

**Figure S3.** SEM image of gelatin microgel.

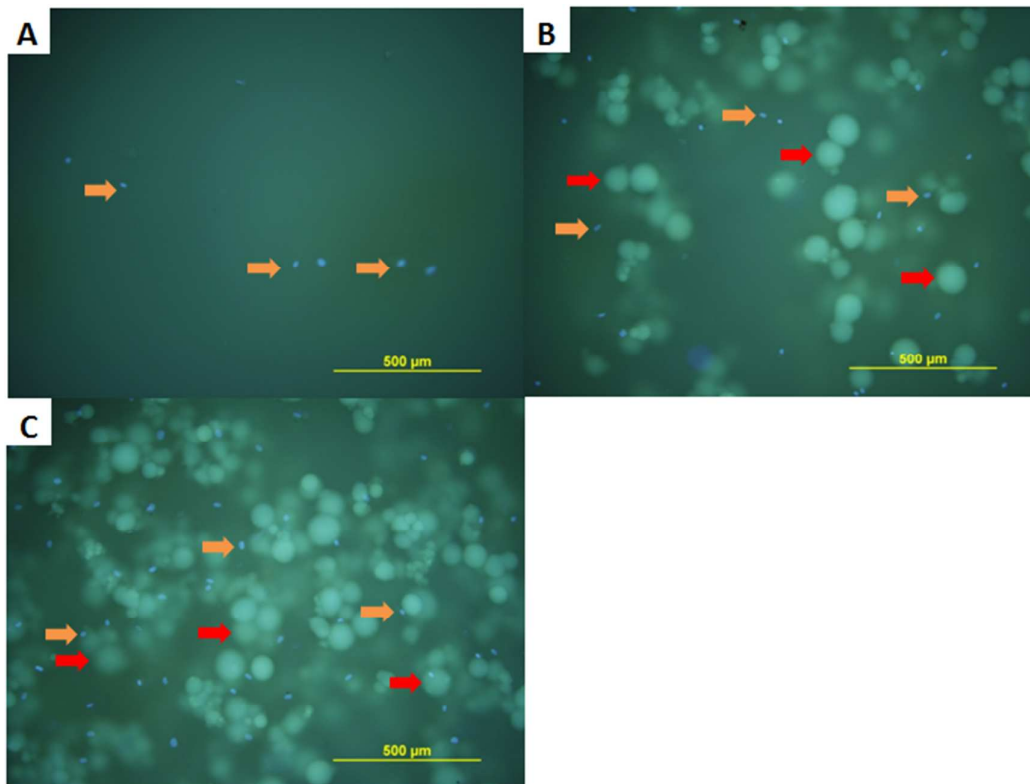

**Figure S4.** DAPI staining of rat dermal fibroblasts for cell attachment test for adhesive containing 0 (A), 3.75 (B), and 7.5 (C) wt% microgel. Small blue dots (orange arrows): cell nuclei; Large cyan dots (red arrows): gelatin microgels.
